# Supplementary material
Source: PubMed Central journal article supplement (PMC9633460)
Supplement: NIHMS1833862-supplement-1.pdf [file NIHMS1833862-supplement-1.pdf]

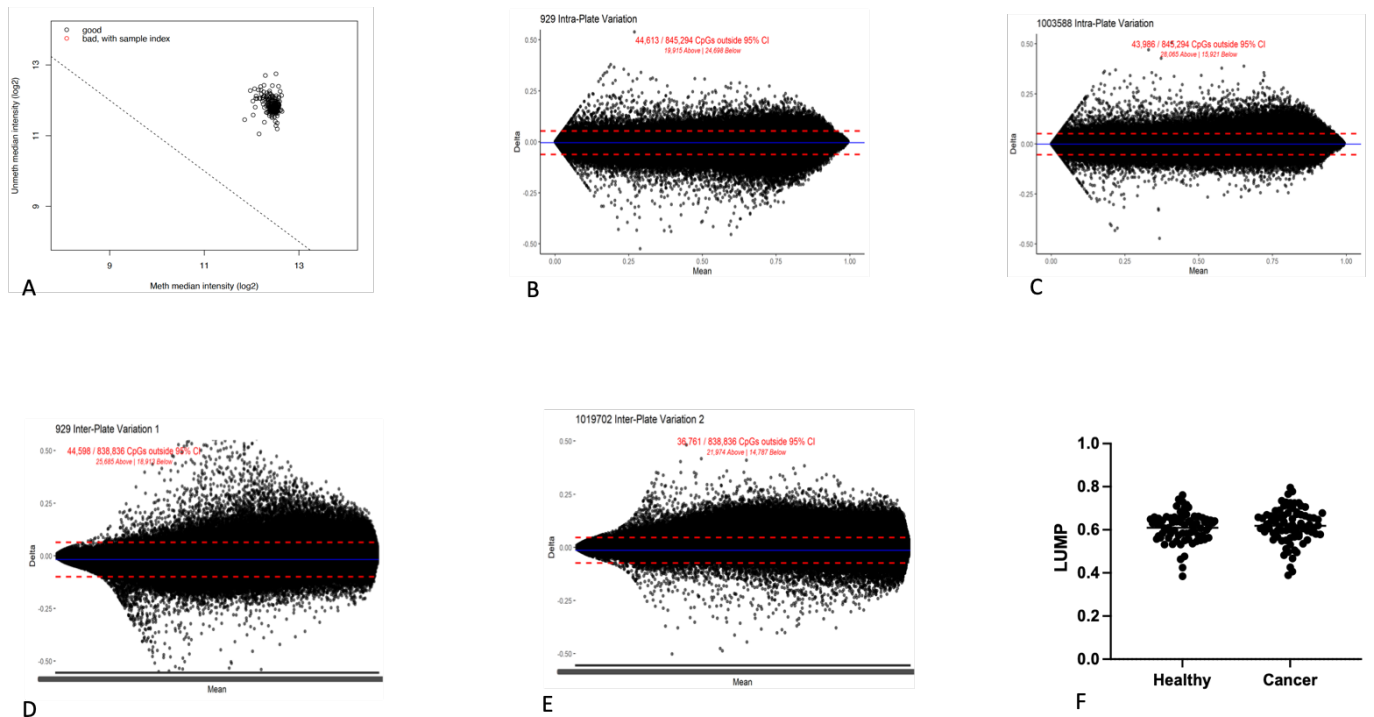

**Supplementary Figure 1: Quality control (QC) analysis of methylation data.** (A) QC plot from minfi. (B-E) Bland-Altman plots for replicate samples. B-C shows the intra-plate replicates. D-E shows the inter-plate replicates. X-axis is the mean of methylation values and y-axis is the difference between the methylation values of the replicates. Red dotted horizontal lines indicate the 95% confidence interval limits for agreement. (F) Cell purity estimation between healthy and cancer tissues using leukocyte unmethylated purity (LUMP) analysis.
