# Supplementary material
Source: PubMed Central journal article supplement (PMC9633460)
Supplement: NIHMS1833862-supplement-3.pdf [file NIHMS1833862-supplement-3.pdf]

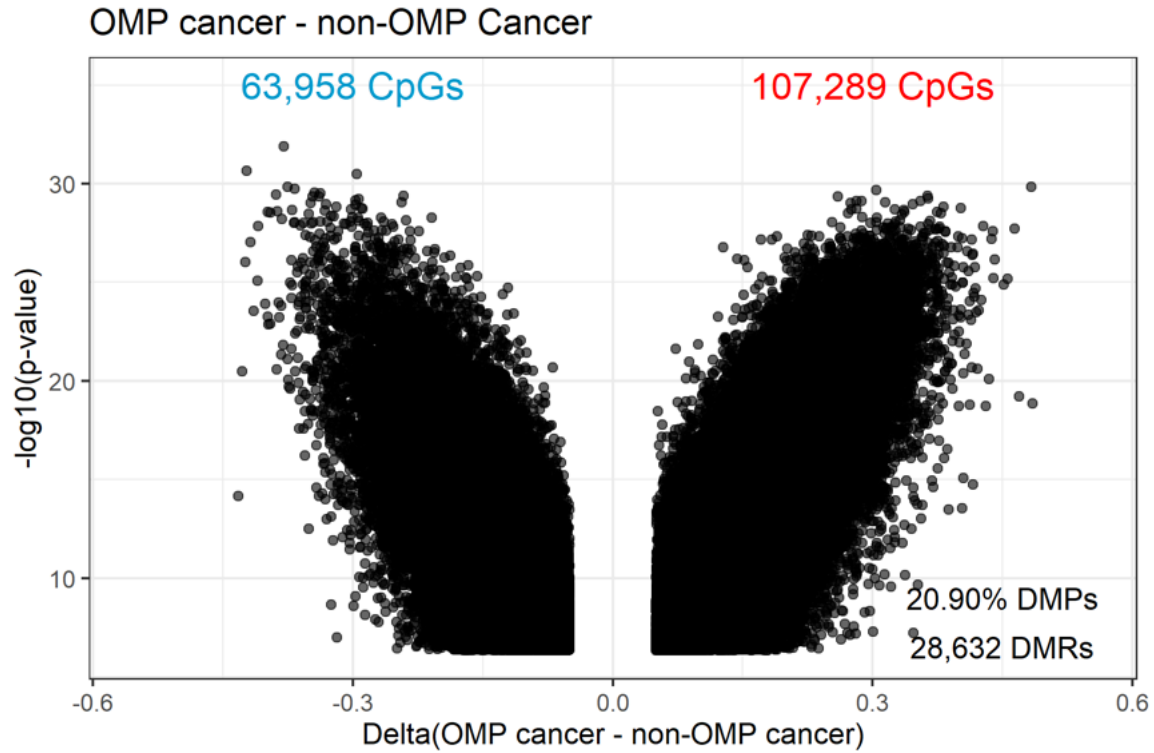

**Supplementary Figure 3: Differential methylation analyses of OMPs vs non-OMPs.** Volcano plots showing differential methylation analyses of OMPs vs non-OMPs. DMPs Differentially Methylated Positions; DMRs Differentially Methylated Regions.
