# Supplementary material
Source: PubMed Central journal article supplement (PMC9633460)
Supplement: NIHMS1833862-supplement-4.pdf [file NIHMS1833862-supplement-4.pdf]

Supplementary Figure 4

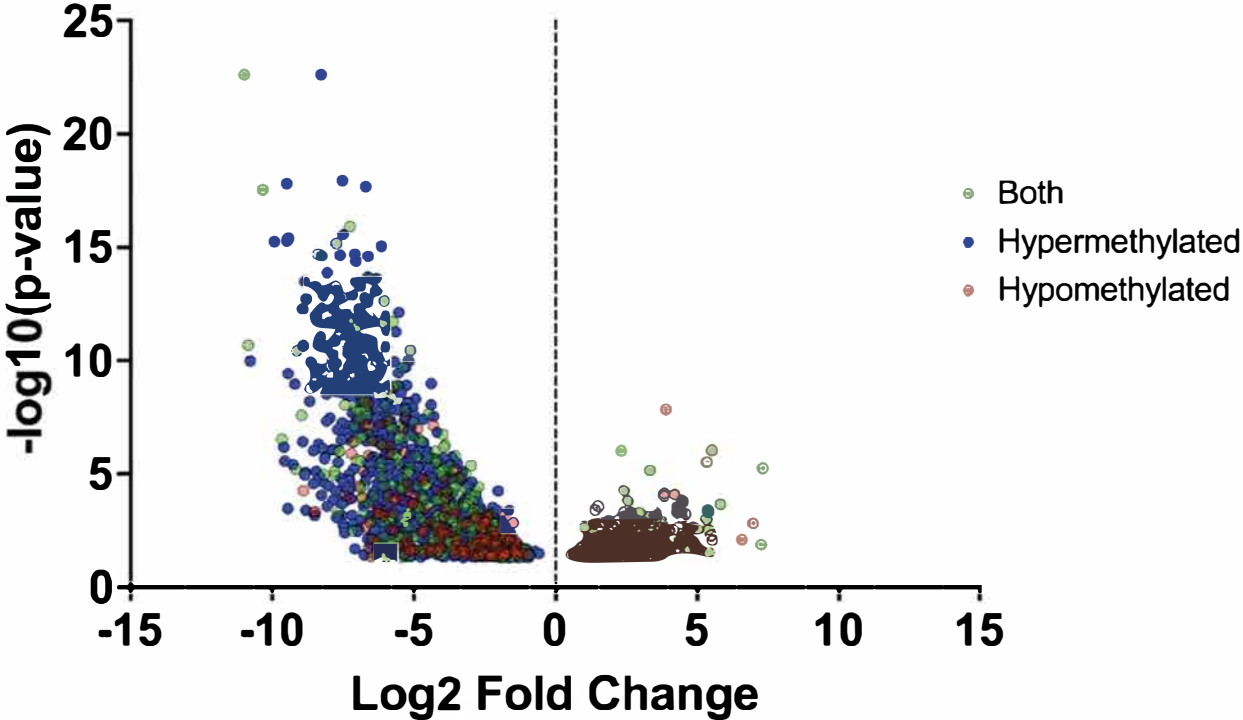

|                  | Up Expressed | Down Expressed |
|------------------|--------------|----------------|
| Hyper methylated | 130          | 1,021          |
| Hypo methylated  | 132          | 173            |
| Both             | 165          | 343            |
| Total            | 427          | 1,537          |

B

A

Supplementary Figure 4: Differential expression analysis. (A) Volcano plot showing genes with differential expression in OMPs vs non-OMP. Each symbol is a gene. Symbols to the left of dotted line are down regulated in OMPs and symbols to the right of the dotted line are up regulated in OMPs compares to non-OMP. Colors indicate the direction of methylation differences in CpGs of these differentially expressed genes. Blue symbols represent genes with hypermethylated CpGs in OMPs, red symbols represent genes with hypomethylated CpGs in OMPs, and green symbols represent genes with both hyper- and hypomethylated CpGs in OMPs compared to non-OMP. (B) Distribution of hyper- and hypomethylated CpGs in the differentially expressed genes.
