# Supplementary material
Source: PubMed Central journal article supplement (PMC9633460)
Supplement: NIHMS1833862-supplement-5.pdf [file NIHMS1833862-supplement-5.pdf]

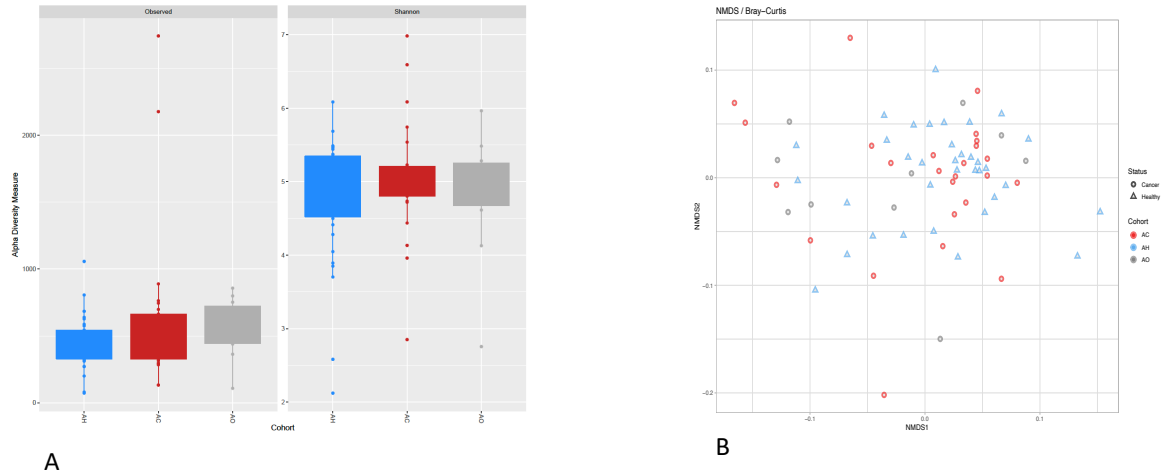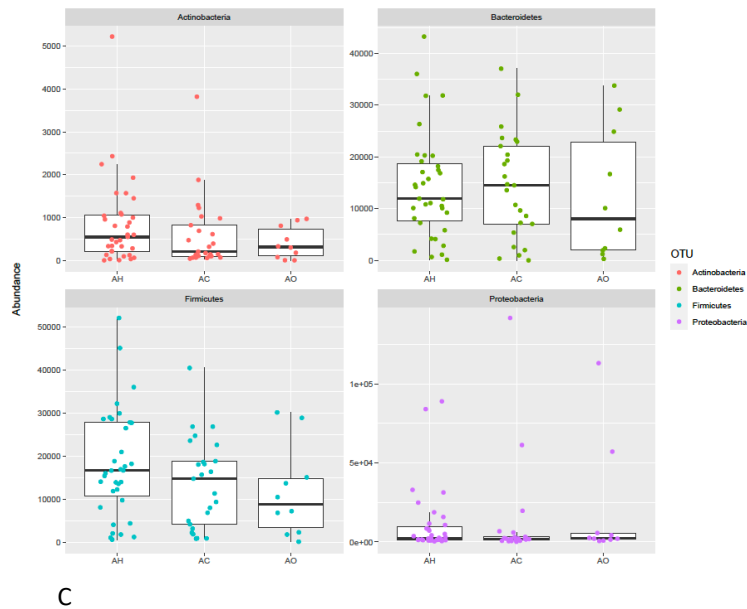

**Supplementary Figure 5: Microbial composition.** (A) Bacterial alpha diversity estimates. Bacterial alpha diversity estimates of microbiome samples associated with colon tissue collected from African American samples. Alpha diversity among cohorts was compared using the number of observed ASVs and Shannon diversity index. (B) Bacterial beta diversity estimates. Bacterial beta diversity estimates of microbiome samples associated with colon tissue samples collected from African American samples. Bray- Curtis distances were ordinated and plotted using non-metrical multidimensional scaling (NMDS). Data points are colored and shaped according to their cohort. (C) Differences in relative abundance of microbiome samples. Differences in relative abundance of microbiome samples (profiled at the phylum level) associated with colon tissue samples collected from African American samples. AH African American Healthy; AC African American Cancer non-OMPs; AO African American Cancer OMPs.
