# Supplementary material
Source: PubMed Central journal article supplement (PMC9633460)
Supplement: NIHMS1833862-supplement-6.pdf [file NIHMS1833862-supplement-6.pdf]

**Supplementary Table 1: Demographic profile of OMP and non-OMP clusters**

|                                |                  | OMP cluster (14) | Non-OMP cluster (130) | P value*      |
|--------------------------------|------------------|------------------|-----------------------|---------------|
| Age (Mean± Standard deviation) |                  | 59.50± 7.24      | 57.05± 9.36           | 0.3510        |
| Sex                            | Males            | 9                | 62                    | 0.2720        |
|                                | Females          | 5                | 68                    |               |
| Race                           | Caucasian        | 3                | 65                    | 0.0508        |
|                                | African American | 11               | 65                    |               |
| Location                       | Distal           | 11               | 67                    | 0.0877        |
|                                | Proximal         | 3                | 63                    |               |
| Cancer status                  | Cancer           | 14               | 62                    | <b>0.0001</b> |
|                                | Healthy          | 0                | 68                    |               |

\*ttest for Age and Fisher's exact test for other variables.

Bold indicates significance.

**Supplementary Table 2: Validation of OMP group in publicly available colorectal cancer datasets**

Supplementary Table 2A: OMP analysis in publicly available colorectal cancer datasets

| GEO dataset | Controls     |                  | CRC patients |                  | p value* |
|-------------|--------------|------------------|--------------|------------------|----------|
|             | OMPs<br>n(%) | Non-OMPs<br>n(%) | OMPs<br>n(%) | Non-OMPs<br>n(%) |          |
| GSE131013   | 1 (2.08)     | 47 (97.92)       | 9 (9.37)     | 87 (90.63)       | 0.16     |
| GSE132804   | 3 (1.29)     | 230 (98.71)      | 30 (29.70)   | 71 (70.3)        | <.0001   |
| GSE48684    | 1 (1.69)     | 58 (98.31)       | 2 (8.33)     | 22 (91.67)       | 0.20     |

\* Fisher's exact test for CRC vs Controls.

Supplementary Table 2B: Demographic profile of GSE132804

|                                |          | Cancer (n=101) | Control (n=233) | P value* |
|--------------------------------|----------|----------------|-----------------|----------|
| Age (Mean± Standard deviation) |          | 59.00± 12.52   | 60.57± 10.53    | 0.1613   |
| Sex                            | Males    | 58             | 116             | 0.2332   |
|                                | Females  | 43             | 117             |          |
| Location                       | Distal   | 101            | 233             | 1.0000   |
|                                | Proximal | 0              | 0               |          |

\*ttest for Age and Fisher's exact test for other variables.
